# Supplementary material for: An increase in food production in Europe could dramatically affect farmland biodiversity
Source: Springer Nature journal article supplement (doi:10.1038/s43247-021-00256-x), 2021-09-02
Supplement: 43247_2021_256_MOESM2_ESM.pdf [file 43247_2021_256_MOESM2_ESM.pdf]

## Description of Additional Supplementary Files

**File Name:** Supplementary Data 1

**Description:** Detailed average yield per region, and organic and non-organic management systems per crop type in MJ/ha (+/- standard error) in ten European farmland regions. Details on regions and country abbreviations are given in Supplementary Table 1.
