# Supplementary material for: An increase in food production in Europe could dramatically affect farmland biodiversity
Source: Springer Nature journal article supplement (doi:10.1038/s43247-021-00256-x), 2021-09-02
Supplement: 43247_2021_256_MOESM3_ESM.pdf [file 43247_2021_256_MOESM3_ESM.pdf]

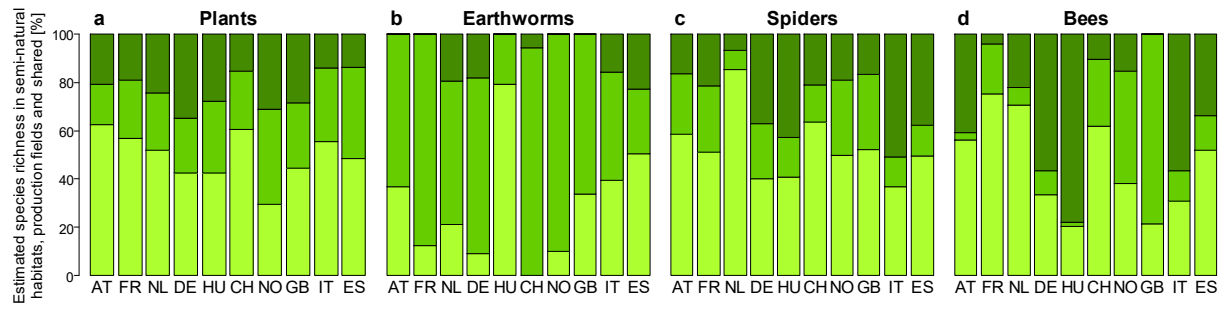

**Supplementary Figure 1 | Importance of semi-natural habitats for biodiversity in ten European farmland regions. a-d**, proportion of plant, earthworm, spider and bee species unique to semi-natural habitats (light green bars) and production fields (dark green bars), and shared by both habitat types (medium green bars). Country abbreviations of regions are given in Supplementary Table 1.

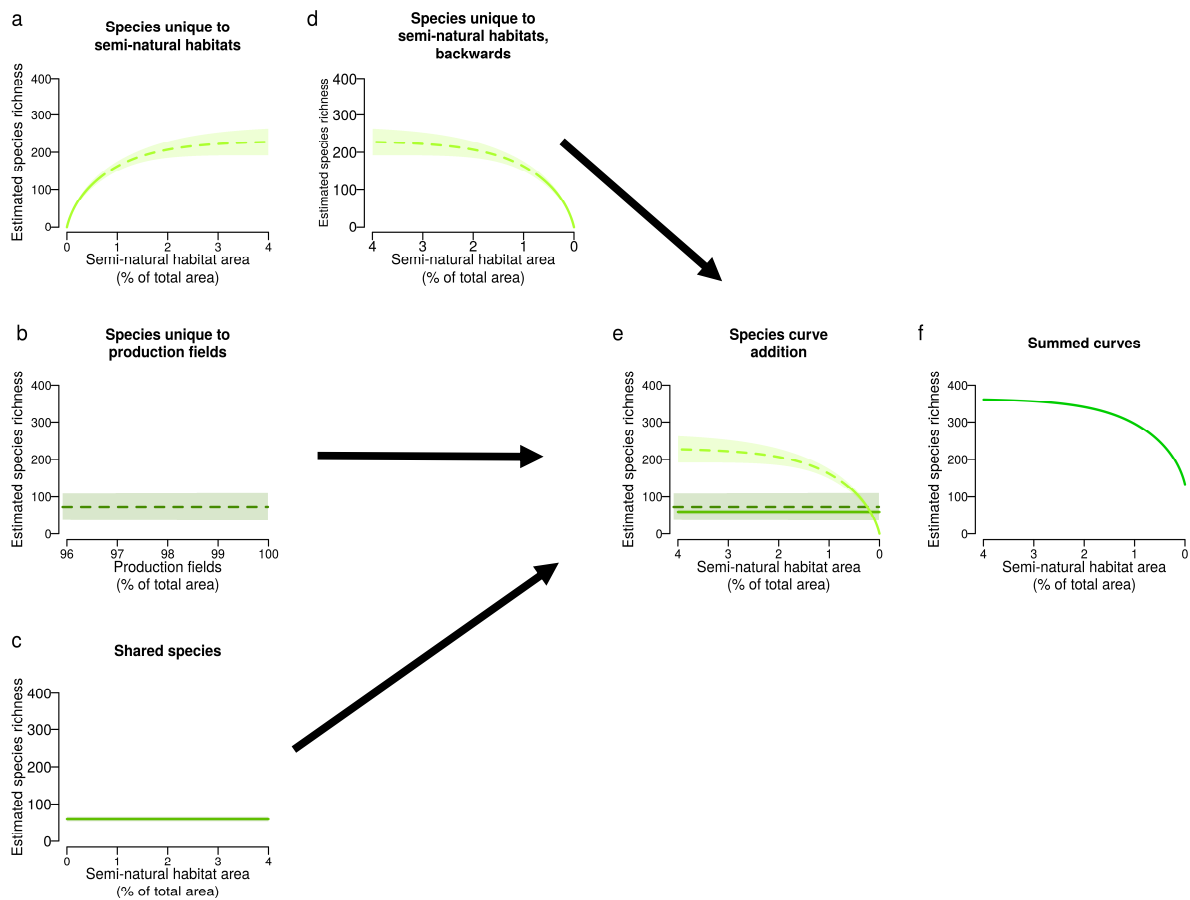

**Supplementary Figure 2 | Step-by-step composition of the species decrease curve for gradual conversion of semi-natural habitats to production fields.** Plant data from region AT are taken as an example. Solid lines indicate interpolated and dashed lines extrapolated estimations. **a**, Accumulation curve of species unique to semi-natural habitats and the corresponding 95% confidence interval with increasing semi-natural area extrapolated up to the number of mapped semi-natural habitats. Area is defined as the number of semi-natural habitat plots multiplied by the average semi-natural habitat area. **b**, Accumulation curve of species unique to production fields and the corresponding 95% confidence interval with increasing production field area. Only the last portion of the curve (96 – 100%) is shown as this is the only relevant part to determine the number of species to be added by conversion of semi-natural habitats to production fields, namely starting from the total mapped area of the production fields. **c**, Species shared across semi-natural habitats and production fields (constant for the “average case” shown here, see Methods). **d**, Backward accumulation curve of species unique to semi-natural habitats and the corresponding 95% confidence interval simulating a continuous loss of semi-natural habitats. **e**, Addition of shared species, species unique to production fields and species unique to semi-natural habitats for continuous conversion of semi-natural habitats to production fields. **f**, Combined curve for gradual conversion of semi-natural habitats to production fields. If started at the observed species richness of species unique to semi-natural habitats, this curve corresponds exactly to a species richness curve calculated by a cumulative random removal of semi-natural habitats one by one from the pool of all habitats. Confidence interval is not drawn but used to define worst and best case situations according to upper and lower bounds (see Methods).

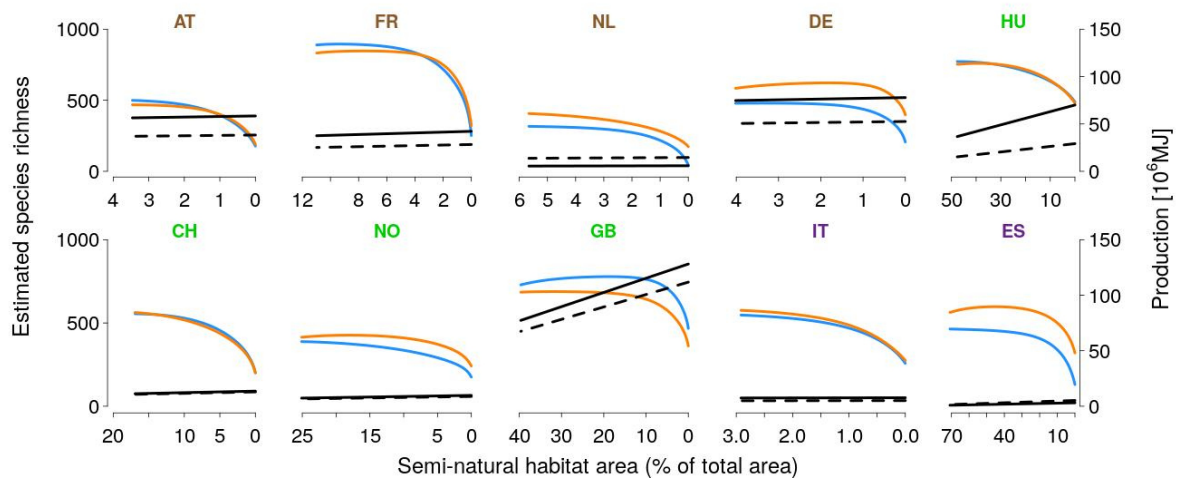

**Supplementary Figure 3 | Estimated species richness and production for gradual conversion of semi-natural habitats to production fields in organic and non-organic systems of ten European farmland regions** (brown: arable crops, mixed systems and horticulture, bright green: grassland, violet: permanent crops). Blue and orange lines indicate estimated species richness as sum of plant, earthworm, spider and wild bee species in non-organic and organic systems, respectively. Black lines indicate production in  $10^6$  MJ, solid and dashed lines for non-organic and organic management, respectively.

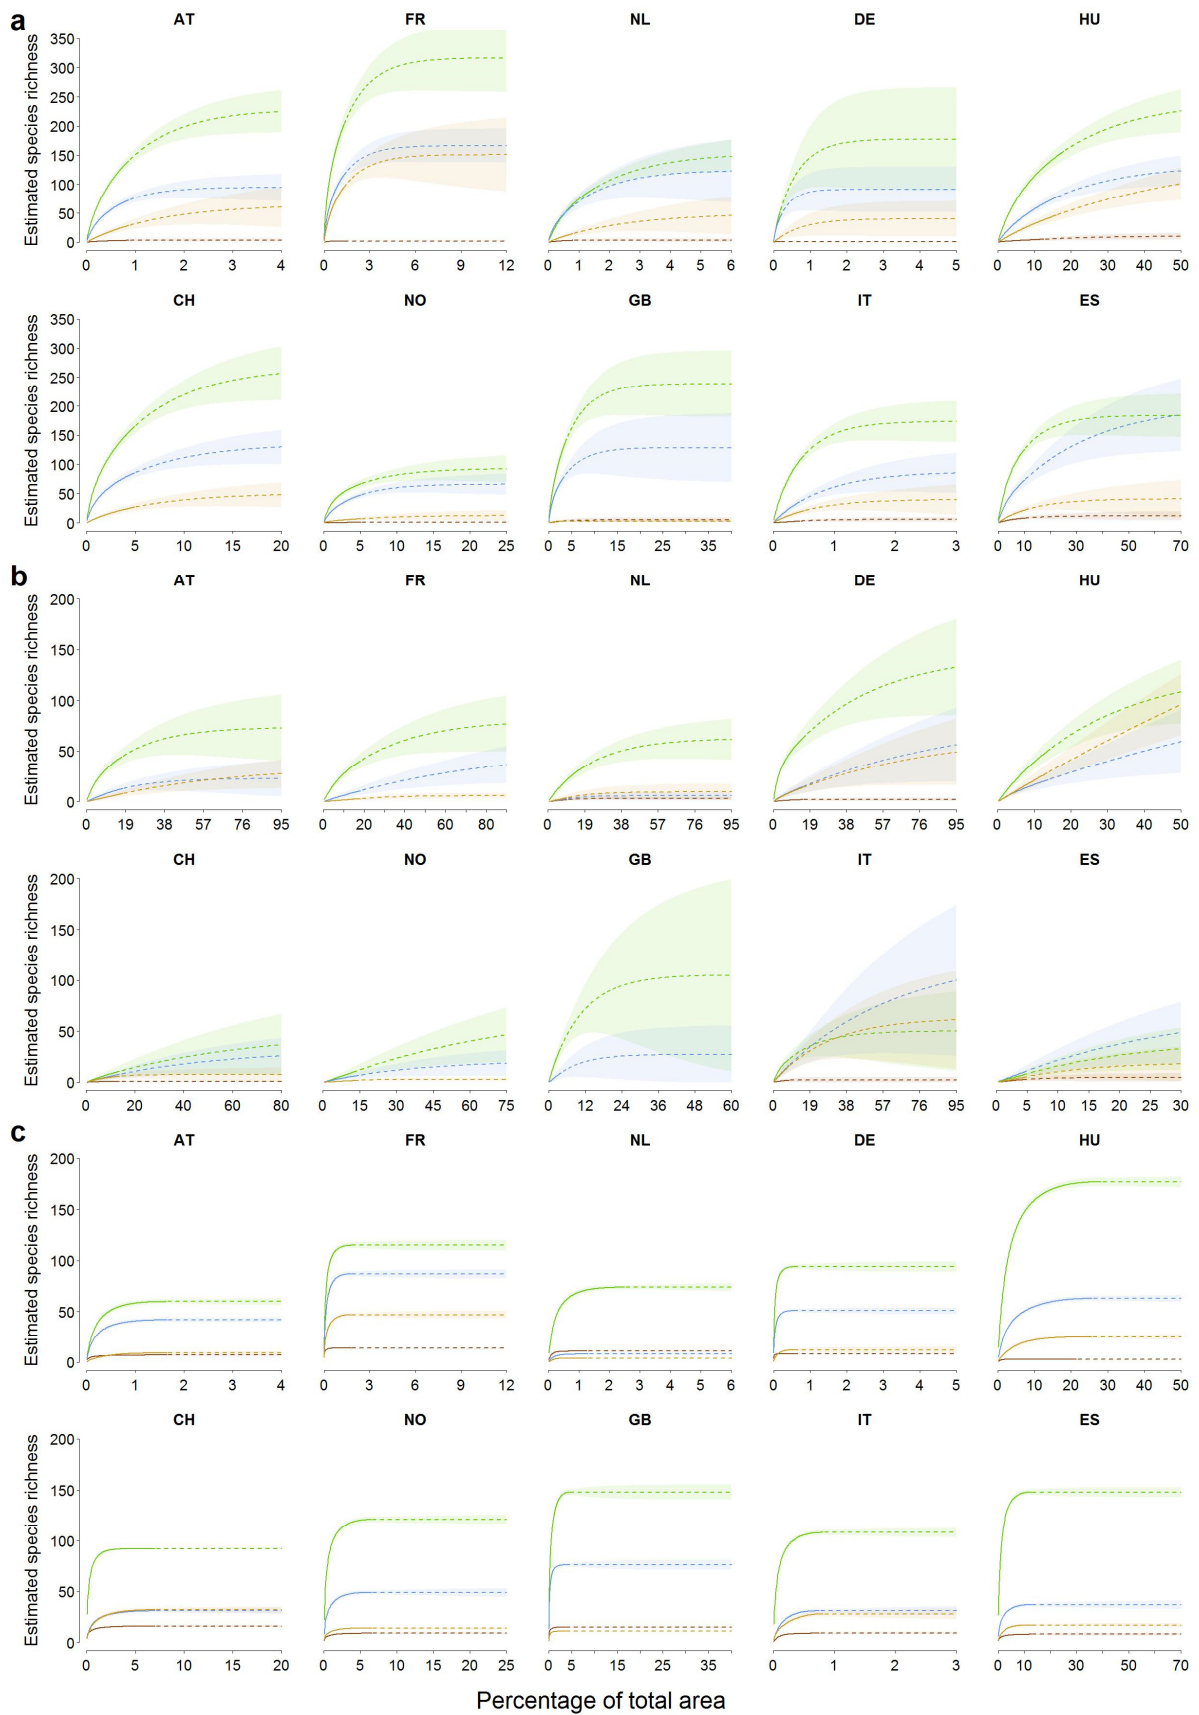

Percentage of total area

**Supplementary Figure 4 | Species accumulation curves of vascular plants, earthworms, spiders and bees collected in semi-natural and production fields of ten European farmland regions. a-c,** Sample-size-based rarefaction (solid lines) and extrapolation (dashed lines), up to the total mapped area to estimate species richness unique to **a**, semi-natural habitats, **b**, production fields and **c**, shared by the two habitat categories. The shaded area is the 95% confidence interval based on a bootstrap method with 50 replications. Curves for plants (green), earthworms (brown), spiders (blue) and bees (dark yellow) are displayed separately for the mapped semi-natural area (**a**, **c**) and the mapped production fields (**b**) as a percentage of the total area per region. Area is calculated as the number of plots (semi-natural or production fields) multiplied by the average area per plot for each region. Curves are missing in cases where no unique species could be found, e.g. earthworms and bees unique to production fields of GB.

**Supplementary Table 1 | Characteristics of the ten study regions.**

| Region | Geographic region (Country)  | Farm type                  | Altitude [m] | Climate           | Rain-fall [mm] | Mean annual temperature [°C] | Farms selected non-organic/organic |
|--------|------------------------------|----------------------------|--------------|-------------------|----------------|------------------------------|------------------------------------|
| AT     | Marchfeld (Austria)          | Arable crops               | 140 - 180    | Pannonian         | 560            | 9.5                          | 8/8                                |
| FR     | Gascony (France)             | Arable crops               | 197 - 373    | Sub-Mediterranean | 680            | 13                           | 8/8                                |
| NL     | Gelderland (The Netherlands) | Horticulture, arable crops | 9 - 35       | Atlantic          | 700            | 9                            | 3/11                               |
| DE     | Southern Bavaria (Germany)   | Arable crops, Mixed        | 350 - 500    | Continental       | 800            | 8.5                          | 8/8                                |
| HU     | Homokhátság (Hungary)        | Grassland, Mixed           | 93 - 168     | Pannonian         | 550            | 10.4                         | 11/7                               |
| CH     | Obwalden (Switzerland)       | Grassland                  | 605 - 1133   | Alpine            | 1300           | 5.6                          | 9/10                               |
| NO     | Hedmark (Norway)             | Grassland                  | 488 - 886    | Boreal            | 470            | 0.4                          | 6/6                                |
| GB     | Wales (United Kingdom)       | Grassland                  | 450 - 1085   | Atlantic          | 1500           | 10                           | 10/10                              |
| IT     | Veneto (Italy)               | Permanent (vineyards)      | 20 - 300     | Mediterranean     | 750            | 12.7                         | 9/9                                |
| ES     | Extremadura (Spain)          | Permanent (olives)         | 400 - 500    | Mediterranean     | 800            | 16.1                         | 10/10                              |

**Supplementary Table 2 | Area, number of mapped elements and number of semi-natural habitats and production fields for species sampling per region.** In brackets, number of habitats where species unique to semi-natural habitat or species unique to production fields were found for plants, earthworms, spiders and bees, respectively.

| Region |                              | Area of semi-natural habitats [ha] | No. of mapped semi-natural habitats | No. of semi-natural habitats for species sampling | Area of production fields [ha] | No. of mapped production fields | No. of production fields for species sampling |
|--------|------------------------------|------------------------------------|-------------------------------------|---------------------------------------------------|--------------------------------|---------------------------------|-----------------------------------------------|
| AT     | Marchfeld Austria            | 37.85                              | 296                                 | 66 (65, 65, 65, 65)                               | 1056.52                        | 308                             | 58 (57, 0, 58, 58)                            |
| FR     | Gascony France               | 123.10                             | 1056                                | 145 (117, 117, 117, 117)                          | 997.98                         | 194                             | 82 (40, 0, 40, 40)                            |
| NL     | Gelderland (The Netherlands) | 15.46                              | 246                                 | 70 (64, 34, 35, 34)                               | 259.95                         | 179                             | 43 (39, 19, 19, 19)                           |
| DE     | Southern Bavaria (Germany)   | 38.60                              | 1154                                | 43 (43,43, 43, 43)                                | 922.66                         | 518                             | 86 (83, 84, 84, 84)                           |
| HU     | Homokhátság (Hungary)        | 816.45                             | 261                                 | 101 (95, 66, 84, 84)                              | 904.05                         | 182                             | 55 (53, 0, 51, 50)                            |
| CH     | Obwalden (Switzerland)       | 31.60                              | 308                                 | 95 (77, 0, 77, 77)                                | 155.19                         | 182                             | 44 (32, 32, 32, 32)                           |
| NO     | Hedmark (Norway)             | 47.29                              | 448                                 | 93 (92, 92, 92, 92)                               | 141.16                         | 129                             | 26 (25, 0, 26, 26)                            |
| GB     | Wales (United Kingdom)       | 1127.85                            | 1880                                | 183 (170, 140, 140, 139)                          | 1717.90                        | 649                             | 53 (43, 0, 32, 0)                             |
| IT     | Veneto (Italy)               | 12.25                              | 267                                 | 46 (46, 40, 40, 46)                               | 409.66                         | 320                             | 28 (28, 28, 28, 28)                           |
| ES     | Extremadura (Spain)          | 115.01                             | 403                                 | 68 (59, 59, 59, 59)                               | 47.73                          | 85                              | 17 (15, 15, 15, 15)                           |

**Supplementary Table 3 | Difference between species richness of unique species in semi-natural habitats and production fields across ten European farmland regions.** Generalized linear mixed model is performed with region as random term. Likelihood ratio test is based on maximum likelihood estimation<sup>1</sup>. SNH: semi-natural habitats. PF: production fields. ns: not significant,  $P > 0.1$ ;  $.P \leq 0.1$ ; \* $P \leq 0.05$ ; \*\* $P \leq 0.01$ ; \*\*\* $P \leq 0.001$ .

| Taxa                            | Response variable       | Direction of effect | n  | df | $\chi^2$ -value | P-value |     |
|---------------------------------|-------------------------|---------------------|----|----|-----------------|---------|-----|
| Vascular plants                 | Unique species richness | SNH > PF            | 20 | 1  | 14.95           | < 0.001 | *** |
| Earthworms                      | Unique species richness | SNH > PF            | 20 | 1  | 10.78           | 0.001   | **  |
| Spiders                         | Unique species richness | SNH > PF            | 20 | 1  | 3.66            | 0.056   | .   |
| Bees                            | Unique species richness | SNH > PF            | 20 | 1  | 2.16            | 0.141   | ns  |
| Four taxa combined <sup>1</sup> | Unique species richness | SNH > PF            | 80 | 1  | 18.34           | < 0.001 | *** |

<sup>1</sup> taxa is considered as an additional random term.



**Supplementary Table 4 | Difference in richness of species unique to semi-natural habitats and production fields between organic and non-organic systems across ten European farmland regions.**

Generalized linear mixed model is performed with region as random term and species group while analysing the four taxa combined. Likelihood ratio test is based on maximum likelihood estimation<sup>1</sup>.

ORG: organic systems; NORG: non-organic systems. Direction of effect indicates the direction over the ten regions with the number of regions between brackets which had higher values. SNH: semi-natural habitats, PF: production fields. ns: not significant,  $P > 0.1$ ;  $.P \leq 0.1$ ;  $*P \leq 0.05$ ;  $**P \leq 0.01$ ;  $***P \leq 0.001$ .

| Taxa               | Response variable                     | Direction of effect | <i>n</i> | df | $\chi^2$ -value | P-value |    |
|--------------------|---------------------------------------|---------------------|----------|----|-----------------|---------|----|
| Vascular plants    | Unique species richness in SNH        | NORG > ORG (6)      | 20       | 1  | 3.43            | 0.06    | .  |
| Vascular plants    | Unique species richness in PF         | ORG > NORG (8)      | 20       | 1  | 3.85            | 0.05    | *  |
| Vascular plants    | Shared species richness by SNH and PF | ORG > NORG (8)      | 20       | 1  | 2.34            | 0.13    | ns |
| Earthworms         | Unique species richness in SNH        | ORG > NORG (4)      | 20       | 1  | 0.13            | 0.71    | ns |
| Earthworms         | Unique species richness in PF         | NORG > ORG (4)      | 20       | 1  | 0.08            | 0.77    | ns |
| Earthworms         | Shared species richness by SNH and PF | ORG > NORG (5)      | 20       | 1  | 1.31            | 0.25    | ns |
| Spiders            | Unique species richness in SNH        | NORG > ORG (6)      | 20       | 1  | 0.05            | 0.83    | ns |
| Spiders            | Unique species richness in PF         | ORG > NORG (10)     | 20       | 1  | 7.16            | 0.01    | ** |
| Spiders            | Shared species richness by SNH and PF | ORG > NORG (5)      | 20       | 1  | 0.56            | 0.45    | ns |
| Bees               | Unique species richness in SNH        | ORG > NORG (3)      | 20       | 1  | 0.03            | 0.85    | ns |
| Bees               | Unique species richness in PF         | NORG > ORG (5)      | 20       | 1  | 0.33            | 0.56    | ns |
| Bees               | Shared species richness by SNH and PF | ORG > NORG (5)      | 20       | 1  | 0.47            | 0.49    | ns |
| Four taxa combined | Unique species richness in SNH        | NORG > ORG (7)      | 80       | 1  | 0.04            | 0.84    | ns |
| Four taxa combined | Unique species richness in PF         | ORG > NORG (9)      | 80       | 1  | 3.20            | 0.07    | .  |
| Four taxa combined | Shared species richness by SNH and PF | ORG > NORG (7)      | 80       | 1  | 1.77            | 0.18    | ns |

**Supplementary Table 5 | Difference between organic and non-organic systems for basic characteristics across ten European farmland regions.** Generalized linear mixed model is performed with region as random term. Likelihood ratio test is based on maximum likelihood estimation<sup>1</sup>. ORG: organic systems. NORG: non-organic systems. Direction of effect indicates the direction over the ten regions with the number of regions between brackets which had higher values. ns: not significant,  $P > 0.1$ , \*\*\* $P \leq 0.001$ .

| Response variable                     | Direction of effect | df | $\chi^2$ -value | P-value |    |
|---------------------------------------|---------------------|----|-----------------|---------|----|
| Overall mapped area                   | NORG > ORG (5)      | 1  | 1.61            | 0.21    | ns |
| Number of semi-natural habitats       | ORG > NORG (4)      | 1  | 1.01            | 0.32    | ns |
| Average size of semi-natural habitats | NORG > ORG (8)      | 1  | 1.58            | 0.21    | ns |
| Number of production fields           | ORG > NORG (4)      | 1  | 0.66            | 0.42    | ns |
| Average size of production fields     | NORG > ORG (5)      | 1  | 0.03            | 0.87    | ns |

**Supplementary Table 6 | Difference in yield between organic and non-organic systems in ten European farmland regions.** For the overall difference in yield, the test is based on 876 fields and generalized linear mixed model is performed with region as random term. Likelihood ratio test is based on maximum likelihood estimation<sup>1</sup>. The magnitude of effect is given in percentage. Details on regions and country abbreviations are given in Supplementary Data Table 1. ns: not significant,  $P > 0.1$ ;  $.P \leq 0.1$ ; \* $P \leq 0.05$ ; \*\* $P \leq 0.01$ ; \*\*\* $P \leq 0.001$ .

| Region  | Response variable | Direction and magnitude of effect | df | $\chi^2$ -value | P-value |     |
|---------|-------------------|-----------------------------------|----|-----------------|---------|-----|
| Overall | Yield (MJ/ha)     | NORG > ORG 15.4                   | 1  | 47.64           | <0.001  | *** |
| AT      | Yield (MJ/ha)     | NORG > ORG 52.5                   | 1  | 14.98           | <0.001  | *** |
| FR      | Yield (MJ/ha)     | NORG > ORG 49.2                   | 1  | 15.90           | <0.001  | *** |
| NL      | Yield (MJ/ha)     | ORG > NORG 147.6                  | 1  | 0.07            | 0.79    | ns  |
| DE      | Yield (MJ/ha)     | NORG > ORG 47.9                   | 1  | 27.04           | <0.001  | *** |
| HU      | Yield (MJ/ha)     | NORG > ORG 139.7                  | 1  | 16.36           | <0.001  | *** |
| CH      | Yield (MJ/ha)     | NORG > ORG 5.4                    | 1  | 0.32            | 0.58    | ns  |
| NO      | Yield (MJ/ha)     | NORG > ORG 10.9                   | 1  | 0.49            | 0.49    | ns  |
| GB      | Yield (MJ/ha)     | NORG > ORG 14.6                   | 1  | 3.30            | 0.07    | .   |
| IT      | Yield (MJ/ha)     | NORG > ORG 50.5                   | 1  | 2.44            | 0.13    | ns  |
| ES      | Yield (MJ/ha)     | ORG > NORG 69.2                   | 1  | 6.36            | 0.03    | *   |

**Supplementary Table 7 | Detail of effects of 90% and 50% semi-natural habitat conversion on species richness and production in ten European farmland regions.** Yield is calculated as the total production divided by the total production field area in regions. Total number of species is the estimated total number of species from the accumulation curves for the overall mapped area, summed over the four taxa. Species loss is the loss of species unique to semi-natural habitats that would disappear by conversion to production fields. Species gain is the gain of species unique to production fields that would be added by conversion of semi-natural habitats. Average, best and worst case situations are explained in Methods. Details on regions and country abbreviations are given in Supplementary Table 1. SE: standard error of the mean.

| Region                                 | AT     | FR     | NL           | DE           | HU              | CH        | NO        | GB        | IT                  | ES               |                       |       |                          |       |                             |       |                           |       |
|----------------------------------------|--------|--------|--------------|--------------|-----------------|-----------|-----------|-----------|---------------------|------------------|-----------------------|-------|--------------------------|-------|-----------------------------|-------|---------------------------|-------|
| Production type                        | arable | arable | horticulture | arable mixed | grassland mixed | grassland | grassland | grassland | permanent vineyards | permanent olives | $\bar{x}$ All regions | SE    | $\bar{x}$ Arable regions | SE    | $\bar{x}$ Grassland regions | SE    | $\bar{x}$ Permanent crops | SE    |
| Yield (MJ/ha)                          | 86994  | 67164  | 98633        | 138830       | 51499           | 141577    | 97770     | 84339     | 31461               | 57233            | 85550                 | 11317 | 97905                    | 15109 | 93796                       | 18658 | 44347                     | 12886 |
| Production (10 <sup>6</sup> MJ)        | 91.9   | 67.0   | 25.6         | 128.1        | 46.6            | 22.0      | 13.8      | 144.9     | 12.9                | 2.7              | 55.6                  | 16.0  | 78.2                     | 21.5  | 56.8                        | 30.2  | 7.8                       | 5.1   |
| Average situation                      |        |        |              |              |                 |           |           |           |                     |                  |                       |       |                          |       |                             |       |                           |       |
| Total number of species                | 625    | 1019   | 497          | 716          | 994             | 676       | 433       | 758       | 694                 | 737              | 715                   | 59    | 714                      | 111   | 715                         | 116   | 715                       | 22    |
| Scenario I = 90% of SNH area converted |        |        |              |              |                 |           |           |           |                     |                  |                       |       |                          |       |                             |       |                           |       |
| Species loss                           | 347    | 355    | 277          | 353          | 598             | 330       | 150       | 269       | 387                 | 339              | 341                   | 36    | 333                      | 19    | 337                         | 95    | 363                       | 24    |
| Species loss (%)                       | 55.5   | 34.8   | 55.7         | 49.3         | 60.2            | 48.9      | 34.7      | 35.6      | 55.9                | 46               | 47.6                  | 3     | 48.8                     | 4.9   | 44.8                        | 6.1   | 50.9                      | 4.9   |
| Species gain                           | 130    | 142    | 81           | 297          | 421             | 88        | 98        | 133       | 233                 | 141              | 176                   | 34    | 163                      | 47    | 185                         | 79    | 187                       | 46    |
| Species gain (%)                       | 20.8   | 13.9   | 16.3         | 41.5         | 42.3            | 13        | 22.7      | 17.5      | 33.6                | 19.1             | 24.1                  | 3.5   | 23.2                     | 6.3   | 23.9                        | 6.5   | 26.4                      | 7.3   |
| Species net change                     | -217   | -213   | -196         | -56          | -178            | -242      | -52       | -137      | -154                | -198             | -164                  | 21    | -170                     | 38    | -152                        | 40    | -176                      | 22    |
| Species net change (%)                 | -34.7  | -20.9  | -39.4        | -7.8         | -17.9           | -35.8     | -12       | -18.1     | -22.2               | -26.9            | -23.6                 | 3.3   | -25.7                    | 7.1   | -20.9                       | 5.2   | -24.6                     | 2.3   |

|                                                                                 |      |      |      |      |      |      |      |      |      |       |      |      |      |      |      |      |       |       |
|---------------------------------------------------------------------------------|------|------|------|------|------|------|------|------|------|-------|------|------|------|------|------|------|-------|-------|
| Production gain (10 <sup>6</sup> MJ)                                            | 3.0  | 7.4  | 1.4  | 4.8  | 37.8 | 4.0  | 4.2  | 85.6 | .3   | 5.9   | 15.5 | 8.5  | 4.1  | 1.3  | 32.9 | 19.3 | 3.1   | 2.8   |
| Production gain (%)                                                             | 3.2  | 11.1 | 5.4  | 3.8  | 81.3 | 18.3 | 30.2 | 59.1 | 2.7  | 216.9 | 43.2 | 21.1 | 5.9  | 1.8  | 47.2 | 14.2 | 109.8 | 107.1 |
| Scenario II = 50% of SNH area converted                                         |      |      |      |      |      |      |      |      |      |       |      |      |      |      |      |      |       |       |
| Species loss                                                                    | 166  | 131  | 125  | 244  | 373  | 135  | 80   | 137  | 238  | 153   | 178  | 27   | 167  | 27   | 181  | 65   | 195   | 42    |
| Species loss (%)                                                                | 26.6 | 12.9 | 25.1 | 34.1 | 37.5 | 20   | 18.5 | 18.1 | 34.3 | 20.8  | 24.8 | 2.6  | 24.7 | 4.4  | 23.5 | 4.7  | 27.5  | 6.7   |
| Species gain                                                                    | 128  | 141  | 81   | 287  | 363  | 84   | 94   | 133  | 228  | 139   | 168  | 30   | 159  | 44   | 169  | 66   | 183   | 44    |
| Species gain (%)                                                                | 20.5 | 13.8 | 16.3 | 40.1 | 36.6 | 12.5 | 21.8 | 17.5 | 32.8 | 18.9  | 23.1 | 3.1  | 22.7 | 6    | 22.1 | 5.2  | 25.8  | 7     |
| Species net change                                                              | -38  | 10   | -44  | 43   | -10  | -51  | 14   | -4   | -10  | -14   | -10  | 9    | -7   | 21   | -13  | 14   | -12   | 2     |
| Species net change (%)                                                          | -6   | 0.9  | -8.7 | 6    | -1   | -7.5 | 3.3  | -0.6 | -1.5 | -1.9  | -1.7 | 1.5  | -2   | 3.4  | -1.4 | 2.2  | -1.7  | 0.2   |
| Production gain (10 <sup>6</sup> MJ)                                            | 1.6  | 4.1  | 0.8  | 2.7  | 21.0 | 2.2  | 2.3  | 47.6 | .2   | 3.3   | 8.6  | 4.7  | 2.3  | .7   | 18.3 | 10.7 | 1.7   | 1.5   |
| Production gain (%)                                                             | 1.8  | 6.2  | 3    | 2.1  | 45.2 | 10.2 | 16.8 | 32.8 | 1.5  | 120.5 | 24   | 11.7 | 3.3  | 1    | 26.2 | 7.9  | 61    | 59.5  |
| Best case situation (production data are the same as for the average situation) |      |      |      |      |      |      |      |      |      |       |      |      |      |      |      |      |       |       |
| Total number of species                                                         | 617  | 951  | 418  | 685  | 999  | 646  | 423  | 752  | 766  | 658   | 692  | 60   | 668  | 110  | 705  | 120  | 712   | 54    |
| Scenario I = 90% of SNH area converted                                          |      |      |      |      |      |      |      |      |      |       |      |      |      |      |      |      |       |       |
| Species loss                                                                    | 383  | 327  | 230  | 363  | 700  | 334  | 171  | 293  | 506  | 298   | 361  | 47   | 326  | 34   | 375  | 114  | 402   | 104   |
| Species loss (%)                                                                | 62.1 | 34.4 | 55.1 | 53.0 | 70.0 | 51.7 | 40.3 | 39.0 | 66.0 | 45.3  | 51.7 | 3.8  | 51.1 | 5.9  | 50.3 | 7.2  | 55.6  | 10.3  |
| Species gain                                                                    | 215  | 281  | 129  | 491  | 632  | 161  | 177  | 224  | 442  | 256   | 301  | 52   | 279  | 77   | 298  | 112  | 349   | 93    |
| Species gain (%)                                                                | 34.8 | 29.6 | 30.8 | 71.6 | 63.2 | 24.9 | 41.9 | 29.8 | 57.7 | 38.9  | 42.3 | 5.1  | 41.7 | 10.0 | 39.9 | 8.5  | 48.3  | 9.4   |

|                        |       |      |       |      |      |       |     |      |      |      |      |     |      |      |       |     |      |     |
|------------------------|-------|------|-------|------|------|-------|-----|------|------|------|------|-----|------|------|-------|-----|------|-----|
| Species net change     | -169  | -45  | -102  | 128  | -68  | -173  | 7   | -70  | -64  | -42  | -60  | 27  | -47  | 63   | -76   | 37  | -53  | 11  |
| Species net change (%) | -27.3 | -4.8 | -24.4 | 18.7 | -6.8 | -26.8 | 1.6 | -9.3 | -8.3 | -6.4 | -9.4 | 4.7 | -9.4 | 10.6 | -10.3 | 6.0 | -7.4 | 0.9 |

Scenario II = 50% of SNH area converted

|                        |      |      |      |      |      |      |      |      |      |      |      |     |      |     |      |     |      |      |
|------------------------|------|------|------|------|------|------|------|------|------|------|------|-----|------|-----|------|-----|------|------|
| Species loss           | 202  | 178  | 112  | 346  | 421  | 149  | 102  | 216  | 365  | 168  | 226  | 35  | 209  | 49  | 222  | 70  | 267  | 99   |
| Species loss (%)       | 32.7 | 18.7 | 26.7 | 50.5 | 42.1 | 23.1 | 24.2 | 28.7 | 47.7 | 25.5 | 32.0 | 3.5 | 32.2 | 6.8 | 29.5 | 4.4 | 36.6 | 11.1 |
| Species gain           | 207  | 265  | 126  | 461  | 525  | 151  | 166  | 224  | 422  | 249  | 280  | 44  | 265  | 71  | 267  | 88  | 336  | 86   |
| Species gain (%)       | 33.5 | 27.8 | 30.3 | 67.4 | 52.5 | 23.4 | 39.4 | 29.7 | 55.1 | 37.9 | 39.7 | 4.5 | 39.7 | 9.3 | 36.3 | 6.3 | 46.5 | 8.6  |
| Species net change     | 5    | 87   | 15   | 115  | 104  | 2    | 64   | 8    | 57   | 82   | 54   | 15  | 55   | 27  | 45   | 24  | 69   | 12   |
| Species net change (%) | 0.8  | 9.1  | 3.5  | 16.9 | 10.4 | 0.3  | 15.2 | 1.0  | 7.4  | 12.4 | 7.7  | 1.9 | 7.6  | 3.5 | 6.7  | 3.6 | 9.9  | 2.5  |

Worst case situation (production data are the same as for the average situation)

|                         |     |      |     |     |      |     |     |     |     |     |     |    |     |     |     |     |     |    |
|-------------------------|-----|------|-----|-----|------|-----|-----|-----|-----|-----|-----|----|-----|-----|-----|-----|-----|----|
| Total number of species | 734 | 1128 | 612 | 951 | 1108 | 798 | 487 | 862 | 877 | 821 | 838 | 63 | 856 | 115 | 814 | 128 | 849 | 28 |
|-------------------------|-----|------|-----|-----|------|-----|-----|-----|-----|-----|-----|----|-----|-----|-----|-----|-----|----|

Scenario I = 90% of SNH area converted

|                        |       |       |       |       |       |       |       |       |       |       |       |     |       |     |       |      |       |      |
|------------------------|-------|-------|-------|-------|-------|-------|-------|-------|-------|-------|-------|-----|-------|-----|-------|------|-------|------|
| Species loss           | 551   | 591   | 435   | 746   | 1139  | 539   | 317   | 430   | 799   | 558   | 611   | 74  | 581   | 64  | 606   | 183  | 678   | 121  |
| Species loss (%)       | 75.1  | 52.4  | 71.2  | 78.5  | 102.8 | 67.6  | 65.0  | 49.9  | 91.2  | 67.9  | 72.1  | 5.1 | 69.3  | 5.8 | 71.3  | 11.2 | 79.5  | 11.6 |
| Species gain           | 215   | 281   | 129   | 491   | 632   | 161   | 177   | 224   | 442   | 256   | 301   | 52  | 279   | 77  | 298   | 112  | 349   | 93   |
| Species gain (%)       | 29.3  | 24.9  | 21.0  | 51.6  | 57.0  | 20.2  | 36.4  | 26.0  | 50.4  | 31.1  | 34.8  | 4.3 | 31.7  | 6.8 | 34.9  | 8.1  | 40.8  | 9.6  |
| Species net change     | -336  | -310  | -307  | -255  | -508  | -379  | -140  | -206  | -357  | -302  | -310  | 32  | -302  | 17  | -308  | 83   | -330  | 28   |
| Species net change (%) | -45.8 | -27.4 | -50.1 | -26.9 | -45.8 | -47.4 | -28.7 | -23.9 | -40.8 | -36.8 | -37.4 | 3.1 | -37.6 | 6.1 | -36.4 | 6.0  | -38.8 | 2.0  |

Scenario II = 50% of SNH area converted

|                        |      |      |       |      |       |       |      |      |      |      |      |     |      |     |      |     |      |      |
|------------------------|------|------|-------|------|-------|-------|------|------|------|------|------|-----|------|-----|------|-----|------|------|
| Species loss           | 279  | 281  | 211   | 505  | 678   | 270   | 190  | 231  | 507  | 299  | 345  | 51  | 319  | 64  | 342  | 113 | 403  | 104  |
| Species loss (%)       | 38.0 | 24.9 | 34.6  | 53.2 | 61.2  | 33.8  | 39.1 | 26.8 | 57.8 | 36.4 | 40.6 | 4.0 | 37.7 | 5.9 | 40.2 | 7.4 | 47.1 | 10.7 |
| Species gain           | 207  | 265  | 126   | 461  | 525   | 151   | 166  | 224  | 422  | 249  | 280  | 44  | 265  | 71  | 267  | 88  | 336  | 86   |
| Species gain (%)       | 28.1 | 23.5 | 20.7  | 48.5 | 47.4  | 18.9  | 34.2 | 25.9 | 48.1 | 30.4 | 32.6 | 3.6 | 30.2 | 6.3 | 31.6 | 6.1 | 39.3 | 8.9  |
| Species net change     | -72  | -16  | -85   | -44  | -153  | -118  | -24  | -8   | -85  | -49  | -66  | 15  | -54  | 15  | -76  | 35  | -67  | 18   |
| Species net change (%) | -9.8 | -1.5 | -13.9 | -4.6 | -13.8 | -14.8 | -4.9 | -0.9 | -9.7 | -6.0 | -8.0 | 2.0 | -7.5 | 2.8 | -8.6 | 3.4 | -7.8 | 1.8  |

**Supplementary Table 8 | Difference in estimated species richness between organic and non-organic systems by conversion of semi-natural habitats to production fields across ten European farmland regions.** Generalized linear mixed model is performed with region as random term, and species group while analysing the four taxa combined. Likelihood ratio test is based on maximum likelihood estimation<sup>1</sup>. ORG: organic systems; NORG: non-organic systems. Direction of effect indicates the direction and the magnitude (%) over the ten regions with the number of regions between brackets which had higher values. SNH: semi-natural habitats, PF: production fields. ns: not significant,  $P > 0.1$ ;  $.P \leq 0.1$ ;  $*P \leq 0.05$ ;  $**P \leq 0.01$ ;  $***P \leq 0.001$ .

| Taxa               | Response variable                     | Direction and magnitude of effect    | <i>n</i> | df | $\chi^2$ -value | P-value |    |
|--------------------|---------------------------------------|--------------------------------------|----------|----|-----------------|---------|----|
| Vascular plants    | Species richness at 90% SNH converted | ORG > NORG -2 <sup>1</sup><br>(7)    | 20       | 1  | 0.54            | 0.46    | ns |
| Vascular plants    | Species richness at 50% SNH converted | ORG > NORG -24.5 <sup>1</sup><br>(7) | 20       | 1  | 0.05            | 0.82    | ns |
| Earthworms         | Species richness at 90% SNH converted | ORG > NORG 0.04<br>(5)               | 20       | 1  | 0.22            | 0.64    | ns |
| Earthworms         | Species richness at 50% SNH converted | ORG > NORG 0.1<br>(5)                | 20       | 1  | 0.7             | 0.4     | ns |
| Spiders            | Species richness at 90% SNH converted | ORG > NORG 27.2<br>(10)              | 20       | 1  | 7.12            | 0.008   | ** |
| Spiders            | Species richness at 50% SNH converted | ORG > NORG 30.1<br>(8)               | 20       | 1  | 4.15            | 0.04    | *  |
| Bees               | Species richness at 90% SNH converted | NORG > ORG 1.6<br>(7)                | 20       | 1  | 0.04            | 0.83    | ns |
| Bees               | Species richness at 50% SNH converted | ORG > NORG 1.4<br>(4)                | 20       | 1  | 0               | 0.99    | ns |
| Four taxa combined | Species richness at 90% SNH converted | ORG > NORG<br>5.9 ± 7.1 (7)          | 80       | 1  | 1.07            | 0.29    | ns |
| Four taxa combined | Species richness at 50% SNH converted | ORG > NORG<br>1.8 ± 11.2 (6)         | 80       | 1  | 0.52            | 0.47    | ns |

<sup>1</sup> in % organic systems have less species while they have more species in absolute values.



**Supplementary Table 9 | Effect on organic and non-organic systems of a 10% production increase goal compared with current non-organic production.** SNH: Semi-Natural Habitats. Species change is calculated for an average situation (Methods and Supplementary Table 12). Non-organic and organic systems in regions that would not be able to achieve 10% more production by conversion of semi-natural habitats are marked in bold.

| Region           | Production type         | Management system  | Yield average (MJ/ha) | Production on production area [MJ] <sup>1</sup> | Additional production 10% [MJ] | Additional area for 10% additional production [ha] | SNH area available [ha] <sup>2</sup> | Additional area for 10% additional production [%] | Species change | Species change [%] |
|------------------|-------------------------|--------------------|-----------------------|-------------------------------------------------|--------------------------------|----------------------------------------------------|--------------------------------------|---------------------------------------------------|----------------|--------------------|
| AT               | <b>arable</b>           | <b>Non-organic</b> | <b>106790</b>         | <b>56413000</b>                                 | <b>5641300</b>                 | <b>52.8</b>                                        | <b>18.9</b>                          | <b>279.1</b>                                      | <b>-321.4</b>  | <b>-64.4</b>       |
| AT               | <b>arable</b>           | <b>Organic</b>     | <b>70002</b>          | <b>36979320</b>                                 | <b>25074980</b>                | <b>358.2</b>                                       | <b>18.9</b>                          | <b>1892.5</b>                                     | <b>-278.3</b>  | <b>-59.5</b>       |
| FR               | arable                  | Non-organic        | 75322                 | 37585160                                        | 3758516                        | 49.9                                               | 61.5                                 | 81.1                                              | -166.1         | -18.7              |
| FR               | <b>arable</b>           | <b>Organic</b>     | <b>50470</b>          | <b>25184040</b>                                 | <b>16159636</b>                | <b>320.2</b>                                       | <b>61.5</b>                          | <b>520.2</b>                                      | <b>-511.2</b>  | <b>-61.4</b>       |
| NL               | horticultural, arable   | <b>Non-organic</b> | <b>42774</b>          | <b>5559574</b>                                  | <b>555957.4</b>                | <b>13.0</b>                                        | <b>7.7</b>                           | <b>168.2</b>                                      | <b>-272.1</b>  | <b>-86.0</b>       |
| NL               | horticultural, arable   | Organic            | 105932                | 13768660                                        | -7653128.6                     | -72.3                                              | 7.7                                  | -934.9                                            | 63.5           | 15.6               |
| DE               | <b>arable, mixed</b>    | <b>Non-organic</b> | <b>161897</b>         | <b>74688160</b>                                 | <b>7468816</b>                 | <b>46.1</b>                                        | <b>19.3</b>                          | <b>239.0</b>                                      | <b>-272.2</b>  | <b>-56.9</b>       |
| DE               | <b>arable, mixed</b>    | <b>Organic</b>     | <b>109411</b>         | <b>50474810</b>                                 | <b>31682166</b>                | <b>289.6</b>                                       | <b>19.3</b>                          | <b>1500.3</b>                                     | <b>-186.6</b>  | <b>-31.9</b>       |
| HU               | <b>grassland, mixed</b> | Non-organic        | 81183                 | 36696680                                        | 3669668                        | 45.2                                               | 408.2                                | 11.1                                              | -3.3           | -0.4               |
| HU               | <b>grassland, mixed</b> | <b>Organic</b>     | <b>33867</b>          | <b>15308470</b>                                 | <b>25057878</b>                | <b>739.9</b>                                       | <b>408.2</b>                         | <b>181.2</b>                                      | <b>-273.3</b>  | <b>-36.3</b>       |
| CH               | grassland               | Non-organic        | 145713                | 11306380                                        | 1130638                        | 7.8                                                | 15.8                                 | 49.1                                              | -117.8         | -21.2              |
| CH               | grassland               | Organic            | 138271                | 10728920                                        | 1708098                        | 12.4                                               | 15.8                                 | 78.2                                              | -160.3         | -28.5              |
| NO               | grassland               | Non-organic        | 103617                | 7313127                                         | 731312.7                       | 7.1                                                | 23.6                                 | 29.9                                              | -51.0          | -13.1              |
| NO               | grassland               | Organic            | 93403                 | 6592223                                         | 1452216.7                      | 15.6                                               | 23.6                                 | 65.8                                              | -12.5          | -3.0               |
| GB               | grassland               | Non-organic        | 90045                 | 77344330                                        | 7734433                        | 85.9                                               | 563.9                                | 15.2                                              | 44.7           | 6.1                |
| GB               | grassland               | Organic            | 78579                 | 67495300                                        | 17583463                       | 223.8                                              | 563.9                                | 39.7                                              | 0.9            | 0.1                |
| IT               | <b>permanent</b>        | <b>Non-organic</b> | <b>36251</b>          | <b>7425392</b>                                  | <b>742539.2</b>                | <b>20.5</b>                                        | <b>6.1</b>                           | <b>334.2</b>                                      | <b>-289.8</b>  | <b>-52.9</b>       |
| IT               | <b>permanent</b>        | <b>Organic</b>     | <b>24088</b>          | <b>4934005</b>                                  | <b>3233926.2</b>               | <b>134.3</b>                                       | <b>6.1</b>                           | <b>2191.0</b>                                     | <b>-300.8</b>  | <b>-52.2</b>       |
| ES               | permanent               | Non-organic        | 37680                 | 899214.2                                        | 89921.42                       | 2.4                                                | 57.5                                 | 4.2                                               | -0.7           | -0.2               |
| ES               | permanent               | Organic            | 63775                 | 1521958                                         | -532822.38                     | -8.4                                               | 57.5                                 | -14.5                                             | 0.9            | 0.2                |
| 10% achieved     | Non-organic             | average            | 88927                 | 28524149                                        | 2852415                        | 33                                                 | 188                                  | 32                                                | -49            | -8                 |
|                  |                         | st. error          | 14506                 | 11607179                                        | 1160718                        | 14                                                 | 97                                   | 12                                                | 32             | 5                  |
|                  | Organic                 | average            | 95992                 | 20021412                                        | 2511565                        | 34                                                 | 134                                  | -153                                              | -22            | -3                 |
|                  |                         | st. error          | 12716                 | 12045311                                        | 4132307                        | 50                                                 | 108                                  | 196                                               | 37             | 7                  |
| 10% not achieved | <b>Non-organic</b>      | <b>average</b>     | <b>86928</b>          | <b>36021532</b>                                 | <b>3602153</b>                 | <b>33</b>                                          | <b>13</b>                            | <b>255</b>                                        | <b>-289</b>    | <b>-65</b>         |
|                  |                         | <b>st. error</b>   | <b>29626</b>          | <b>17456112</b>                                 | <b>1745611</b>                 | <b>10</b>                                          | <b>4</b>                             | <b>35</b>                                         | <b>12</b>      | <b>7</b>           |
|                  | <b>Organic</b>          | <b>average</b>     | <b>57568</b>          | <b>26576129</b>                                 | <b>20241717</b>                | <b>368</b>                                         | <b>103</b>                           | <b>1257</b>                                       | <b>-310</b>    | <b>-48</b>         |
|                  |                         | <b>st. error</b>   | <b>15125</b>          | <b>7989534</b>                                  | <b>4916137</b>                 | <b>100</b>                                         | <b>77</b>                            | <b>390</b>                                        | <b>54</b>      | <b>6</b>           |

<sup>1</sup>calculated for a standardized area of the production fields across both systems (Methods)

<sup>2</sup>standardized across both management systems
